# Supplementary material for: Impacts of elevated CO2 and partial defoliation on mineral element composition in rice
Source: Front Plant Sci. 2024 Nov 18;15:1450893. doi: 10.3389/fpls.2024.1450893 (PMC11608955; doi:10.3389/fpls.2024.1450893)
Supplement: Supplementary file 1 [file Table1.docx]

Impacts of elevated CO2 and defoliation on mineral element composition in rice

Bo Gaoa,b, Shaowu Hua, Mingyuan Zhouc, Liquan Jinga, Yunxia Wangd, Jianguo Zhue, Xingxing Sunb, Kai Wangb, Yulong Wanga, Lianxin Yanga,*

a *Key Laboratory of Crop Genetics and Physiology of Jiangsu Province/Co-Innovation Center for Modern Production Technology of Grain Crops of Jiangsu Province, Yangzhou University, Yangzhou 225009, Jiangsu, China*

b *Jiangsu Coastal Area Institute of Agricultural Sciences, Yancheng 224002, Jiangsu, China*

c *Suzhou Polytechnic Institute of Agriculture, Suzhou 215008, Jiangsu, China*

d *College of Environmental Science and Engineering, Yangzhou University, Yangzhou 225009, Jiangsu, China*

e *State Key Laboratory of Soil and Sustainable Agriculture, Institute of Soil Science, Chinese Academy of Sciences, Nanjing 210008, Jiangsu, China*

* Corresponding author: Email: lxyang@yzu.edu.cn.

**SUPPLEMENTARY MATERIAL**

**Table S1**

Response of elements concentrations in grain to elevated CO2 under CK (no leaf cutting) and LC (cutting off top three leaves at heading ) in 2017 and 2018 growing seasons. Data is excerpted from previous reporting (Gao *et al*.2021a).

| Year | Treatment | CO2 | N (mg g-1) | Ca (mg g-1) | K (mg g-1) | Mg (mg g-1) | P (mg g-1) | S (mg g-1) | B (mg kg-1) | Cu (mg kg-1) | Fe (mg kg-1) | Mn (mg kg-1) | Zn (mg kg-1) |
| --- | --- | --- | --- | --- | --- | --- | --- | --- | --- | --- | --- | --- | --- |
| 2017 | CK | AC | 15.9±0.8 | 0.21±0.01 | 2.87±0.03 | 1.43±0.02 | 4.01±0.03 | 1.24±0.01 | 1.60±0.07 | 5.14± 0.46 | 36.8±1.8 | 46.1±2.9 | 30.4±1.92 |
|  |  | EC | 15.9±0.4 | 0.21±0.01 | 3.02±0.02 | 1.41±0.06 | 3.99±0.09 | 1.27±0.03 | 1.83±0.18 | 4.11±0.54 | 35.4±0.1 | 44.1±1.0 | 29.2±1.7 |
|  |  | % Change | -0.2 ns | 1.7 ns | 5.0 * | -1.3 ns | -0.41 ns | 2.0 ns | 14.9 ns | -20.0 ns | -3.8 ns | -4.4 ns | -3.8 ns |
|  | LC | AC | 17.9±0.8 | 0.23±0.02 | 3.17±0.07 | 1.47±0.01 | 4.20±0.06 | 1.34±0.05 | 1.99±0.34 | 5.14±0.73 | 44.2±7.6 | 46.9±5.2 | 34.3±1.1 |
|  |  | EC | 17.2±0.7 | 0.22±0.01 | 3.42±0.08 | 1.47±0.03 | 4.25±0.10 | 1.30±0.03 | 1.65±0.02 | 4.17±0.63 | 39.2±2.8 | 4579±1.7 | 31.2±1.3 |
|  |  | % Change | -3.7 ns | -5.2 ns | 7.8 + | 0.3 ns | 1.2 ns | -2.8 ns | -17.4 ns | -19.0 ns | -11.3 ns | -2.6 ns | -8.9 ns |
| 2018 | CK | AC | 12.9±0.2 | 0.20±0.010 | 3.52±0.10 | 1.87±0.02 | 4.66±0.08 | 1.19±0.01 | 5.45±0.09 | 4.80±0.66 | 30.6±1.2 | 35.7±2.5 | 22.5±0.8 |
|  |  | EC | 12.9±0.4 | 0.20±0.00 | 3.47±0.02 | 1.84±0.04 | 4.66±0.07 | 1.20±0.01 | 5.36±0.07 | 4.97±0.38 | 25.7±1.1 | 37.7±2.9 | 26.2±0.7 |
|  |  | % Change | 0.2 ns | -1.2 ns | -1.5 ns | -1.3 ns | 0.1 ns | 0.4 ns | -1.6 ns | 3.4 ns | -15.9 * | 5.6 ns | 16.1 * |
|  | LC | AC | 15.9±0.7 | 0.19±0.01 | 3.72±0.03 | 1.92±0.04 | 5.15±0.100 | 1.32±0.05 | 5.22±0.18 | 5.01±0.37 | 29.4±3.5 | 35.6±0.7 | 26.8±0.3 |
|  |  | EC | 15.3±0.4 | 0.19±0.00 | 3.68±0.08 | 1.92±0.01 | 5.18±0.06 | 1.30±0.01 | 5.45±0.16 | 5.08±0.65 | 30.2±3.2 | 37.7±1.9 | 28.7±0.9 |
|  |  | % Change | -3.6 ns | 0.5 ns | -1.0 ns | 0.3 ns | 0.5 ns | -1.1 ns | 4.4 ns | 1.4 ns | 2.7 ns | 6.0 ns | 7.0 ns |
| ANOVA results (*P* value) | | | |  |  |  |  |  |  |  |  |  |  |
| CO2 | | | 0.457 | 0.627 | **0.096**↑ | 0.774 | 0.787 | 0.815 | 0.950 | 0.287 | 0.294 | 0.908 | 0.704 |
| LC | | | **< 0.001**↑ | 0.468 | **< 0.001**↑ | **0.021**↑ | **< 0.001**↑ | **< 0.001**↑ | 0.874 | 0.818 | 0.152 | 0.754 | **0.002**↑ |
| Year | | | **< 0.001**↓ | **0.003**↓ | **< 0.001**↑ | **< 0.001**↑ | **< 0.001**↑ | 0.101 | **< 0.001**↑ | 0.431 | **0.001**↓ | **< 0.001**↓ | **< 0.001**↓ |
| CO2 × LC | | | 0.465 | 0.807 | 0.499 | 0.568 | 0.696 | 0.397 | 0.577 | 0.979 | 0.833 | 0.904 | 0.305 |
| CO2 × Year | | | 0.931 | 1.000 | **0.014** | 1.000 | 1.000 | 0.938 | 0.606 | 0.183 | 0.814 | 0.345 | **0.012** |
| LC × Year | | | 0.215 | **0.040** | 0.118 | 0.720 | **0.022** | 0.284 | 0.463 | 0.872 | 0.430 | 0.750 | 0.794 |
| CO2 × LC × Year | | | 0.992 | 0.468 | 0.598 | 1.000 | 0.810 | 0.587 | **0.073** | 0.930 | 0.354 | 0.928 | 0.972 |

AC and EC refer to ambient CO2 and elevated CO2,respectively. CK and LC refer to no leaf cutting and cutting off top three leaves, respectively. Values are means ± standard error (n = 3). Statistically significant effects are indicated as + *P* < 0.1;** *P* < 0.01;* *P* < 0.05; ns, not significant. ↑ and ↓ represent the positive and negative effects of CO2 or LC, respectively, or represent increase and decrease in 2018 compared to 2017, respectively.

**Table S2**

Analysis of variance for the concentrations of non-structural carbohydrate (NSC), macroelements, and microelements in rice straw in response to elevated CO2, year, leaf-cutting (LC), and organ in 2017 and 2018 growing seasons..

| ANOVA | NSC | Macroelements | | | | | |  | Microelements | | | | |
| --- | --- | --- | --- | --- | --- | --- | --- | --- | --- | --- | --- | --- | --- |
| N | Ca | K | Mg | P | S |  | B | Cu | Fe | Mn | Zn |
| CO2 | **↑ | **↓ | ns | ns | ns | *↑ | *↓ |  | +↓ | ns | *↓ | ns | *↓ |
| Year | **↑ | **↓ | **↓ | **↓ | *↑ | **↓ | **↓ |  | **↑ | **↓ | **↓ | ns | *↑ |
| LC | **↓ | *↓ | ns | ns | **↑ | **↑ | **↑ |  | **↑ | ns | **↑ | ns | *↑ |
| Organ | ** | ** | ** | ** | ** | * | ** |  | ** | ** | ** | ** | ** |
| CO2 × Year | * | * | * | ns | ns | + | ns |  | ns | + | ns | * | ns |
| CO2 × LC | ** | ns | ns | ns | ns | ns | ns |  | ns | ns | * | ns | ns |
| CO2 × Organ | ** | ns | ns | ns | ns | ** | ns |  | * | ** | ** | + | * |
| Year × LC | ns | ** | * | + | + | ns | ns |  | ** | ns | ** | ns | * |
| Year × Organ | ns | ** | ** | ** | * | ** | ** |  | ns | * | ns | ** | ** |
| LC × Organ | ** | ns | ns | ** | ** | ns | * |  | ns | ns | ns | ** | ns |
| CO2 × Year × LC | ns | ns | ns | ns | + | ns | + |  | ns | ns | + | ns | ns |
| CO2 × Year × Organ | ns | ns | ns | ns | ns | ns | ns |  | ns | ns | ns | ns | ns |
| CO2 × LC × Organ | ns | ns | ns | ns | ns | ns | + |  | ns | ns | + | ns | ns |
| Year × LC × Organ | ns | ** | + | ns | ns | ns | ns |  | + | ns | ns | ns | ** |
| CO2 × Year × LC × Organ | ns | ns | ns | ns | ns | * | ns |  | ns | ns | * | ns | ns |

Statistically significant effects are indicated as ** *P* < 0.01; * *P* < 0.05; + *P* < 0.1; ns, not significant. ↑ and ↓ represent the positive and negative effects of CO2 or LC, respectively, or represent increase and decrease in 2018 compared to 2017, respectively.

**Table S3**

Analysis of variance (ANOVA) results of the effects of elevated CO2 and leaf-cutting treatment (LC) on the mineral elements allocations in rice stem, leaf, and grain in 2017 and 2018 growing seasons.

| **Organ** | **ANOVA** | **N** | **Ca** | **K** | **Mg** | **P** | **S** | **B** | **Cu** | **Fe** | **Mn** | **Zn** |
| --- | --- | --- | --- | --- | --- | --- | --- | --- | --- | --- | --- | --- |
| **Stem** | CO2 | ns | ns | +↑ | ns | ns | ns | ns | ns | *↓ | *↓ | +↓ |
|  | LC | **↑ | **↑ | **↑ | **↑ | **↑ | **↑ | **↑ | **↑ | **↑ | **↑ | **↑ |
|  | Year | **↑ | ns | **↓ | **↑ | **↓ | **↑ | **↓ | ns | **↑ | **↓ | **↑ |
|  | CO2 × LC | ns | ns | ns | ns | ns | ns | ns | ns | + | ns | ns |
|  | CO2 × Year | ns | * | ns | ns | ns | ns | ns | ns | * | ns | * |
|  | LC × Year | ns | * | ** | * | ns | + | ns | ns | ns | * | ** |
|  | CO2 × LC × Year | ns | ns | ns | + | ns | ns | * | ns | * | ns | ns |
| **Leaf** | CO2 | +↓ | ns | +↓ | ns | *↑ | ns | ns | **↑ | **↑ | ns | ns |
|  | LC | **↓ | **↓ | **↓ | **↓ | **↓ | **↓ | **↓ | **↓ | **↓ | **↓ | **↓ |
|  | Year | ns | ns | *↑ | *↓ | **↓ | ns | **↓ | **↓ | *↓ | **↑ | ns |
|  | CO2 × LC | ns | ns | ns | ns | + | ns | ns | ns | * | ns | ns |
|  | CO2 × Year | ns | ns | ns | ns | ns | ns | * | + | ** | ns | ns |
|  | LC × Year | ns | + | ** | ns | * | ns | ** | ns | ns | * | ** |
|  | CO2 × LC × Year | ns | ns | + | ns | ns | ns | ns | ns | + | + | ns |
| **Grain** | CO2 | ns | ns | ns | ns | ns | ns | ns | ns | ns | ns | *↑ |
|  | LC | ns | +↑ | **↓ | **↓ | **↓ | **↓ | **↓ | *↓ | **↓ | ns | **↓ |
|  | Year | *↓ | **↓ | **↑ | ns | **↑ | **↓ | **↑ | ns | **↓ | **↓ | **↓ |
|  | CO2 × LC | ns | ns | ns | ns | ns | ns | ns | ns | ns | ns | ns |
|  | CO2 × Year | + | + | ns | ns | ns | ns | ns | ns | ns | ns | * |
|  | LC × Year | ns | ns | * | ns | ns | ns | + | ns | ns | ns | + |
|  | CO2 × LC × Year | ns | ns | ns | ns | ns | + | + | ns | ns | ns | ns |

Statistically significant effects are indicated as + *P* < 0.1;** *P* < 0.01;* *P* < 0.05; ns, not significant. ↑ and ↓ represent the positive and negative effects of CO2 or LC, respectively, or represent increase and decrease in 2018 compared to 2017, respectively.
